# Supplementary material for: An integrative metatranscriptomic analysis reveals differences in enteric methanogenesis mechanisms between cows and goats
Source: Research Square preprint supplement (doi:10.21203/rs.3.rs-1828071/v1), 2022-07-15
Supplement: Supplementary file 1 [file f58e9f5afac5a53e74fb7bea.xlsx]

## Sheet: Hoja1
Cluster 1 in Cows	Cluster 5 in Goats	Cluster 1 in Goats
K00320 (5,10-methylenetetrahydromethanopterin reductase)	K00202 (formylmethanofuran dehydrogenase subunit C)	K04041 (fructose-1,6-bisphosphatase III)
K00579 (tetrahydromethanopterin S-methyltransferase subunit C)	K00320 (5,10-methylenetetrahydromethanopterin reductase)	K00399 (methyl-coenzyme M reductase alpha subunit)
K00581 (tetrahydromethanopterin S-methyltransferase subunit E)	K04480 (methanol---5-hydroxybenzimidazolylcobamide Co-methyltransferase)	K00401 (methyl-coenzyme M reductase beta subunit)
K00584 (tetrahydromethanopterin S-methyltransferase subunit H)	K14081 (methanol corrinoid protein)
K01623 (fructose-bisphosphate aldolase, class I)	K03422 (methyl-coenzyme M reductase subunit D)
K03422 (methyl-coenzyme M reductase subunit D)	K00402 (methyl-coenzyme M reductase gamma subunit)
K00201 (formylmethanofuran dehydrogenase subunit B)	K14126 (F420-non-reducing hydrogenase large subunit)
K00402 (methyl-coenzyme M reductase gamma subunit)	K14128 (F420-non-reducing hydrogenase small subunit)
